# Supplementary material for: Warmer winters causes an increase of chlorophyll-a concentration indeeper layers: the opposite role of convection and self-shading on theexample of the Black Sea
Source: Copernicus journal article supplement (doi:10.5194/bg-2020-366), 2020-10-15
Supplement: Supplementary file 1 [file bg-2020-366-supplement.pdf]

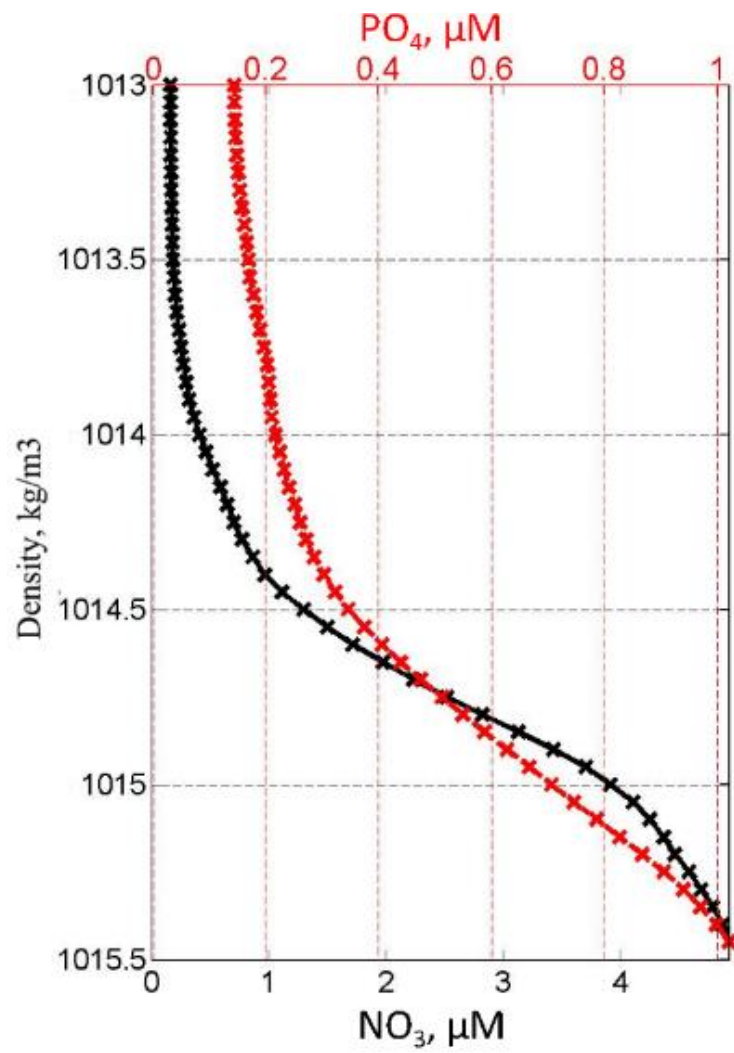

**Supplementary Fig. S1.** The multi-annual average vertical profiles of nitrate (NO<sub>3</sub>) and phosphate (PO<sub>4</sub>) in  $\sigma$ -coordinates for October, the month preceding the onset of intense winter convection.
